# Supplementary material
Source: Royal Society of Chemistry journal article supplement (doi:10.1039/d6sm00259e)
Supplement: d6sm00259e1.pdf [file d6sm00259e1.pdf]

Supplementary information for  
**Convective flow in coalesced droplets under temperature difference for  
uniform distribution of microspheres in vertical contact-separation**

Shinji Bono\*, Shintaro Okai, Mary-Johanna Weir Weiss, Boris Stoeber, Satoshi Konishi\*

\*Corresponding author. Email: [bono@fc.ritsumei.ac.jp](mailto:bono@fc.ritsumei.ac.jp), [konishi@se.ritsumei.ac.jp](mailto:konishi@se.ritsumei.ac.jp)

Figure S1 shows transmission microscopic image of microspheres (MSs) on wetting pattern (WP) substrate after drying. The size of MSs is 2  $\mu\text{m}$ . The observation area is a part of circular WP. Only a few MSs are stacked.

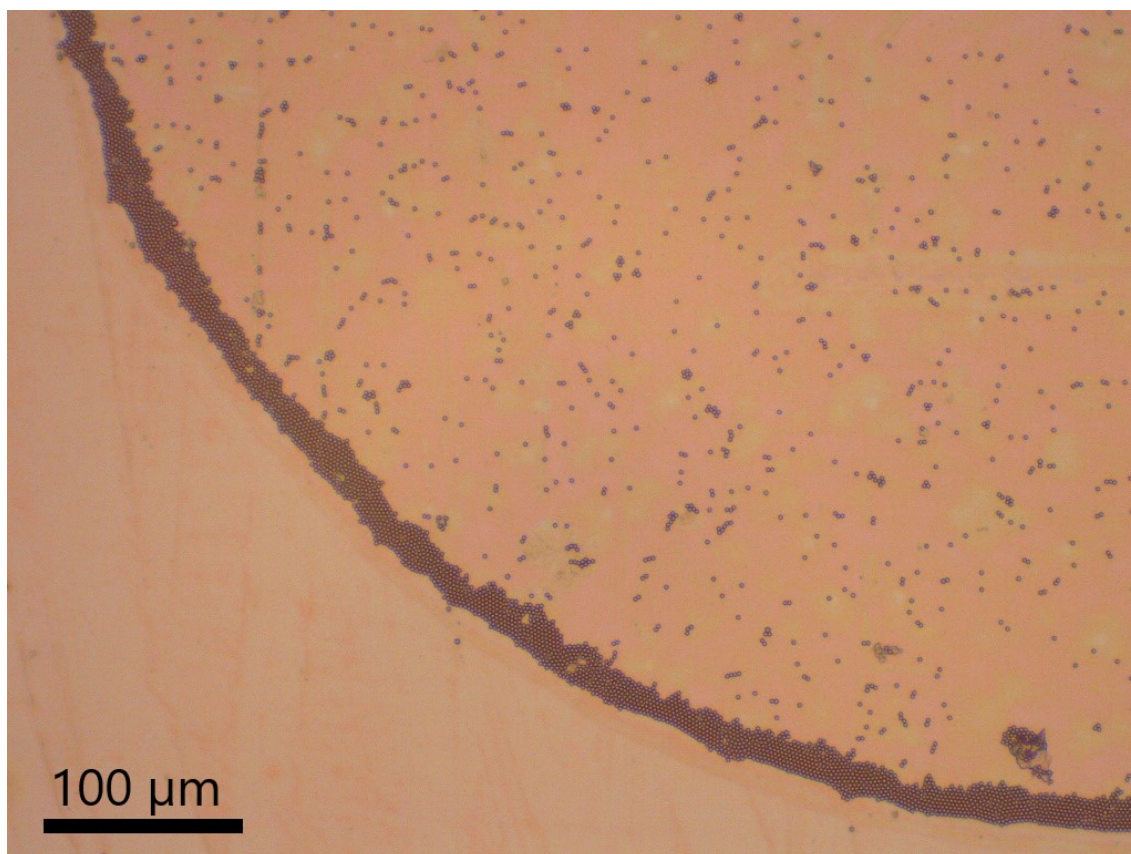

Fig. S1 Transmission microscopic image of microspheres on wetting pattern substrate after drying.
